# Supplementary material
Source: PubMed Central journal article supplement (PMC6891208)
Supplement: NIHMS1541085-supplement-1.pdf [file NIHMS1541085-supplement-1.pdf]

## Supplemental Information

to

### **Gastrointestinal tract dysbiosis enhances distal tumor progression through suppression of leukocyte trafficking**

Samir V. Jenkins,<sup>1</sup> Michael S. Robeson II,<sup>2</sup> Robert J. Griffin,<sup>1</sup> Charles M. Quick,<sup>3</sup>  
Eric R. Siegel,<sup>4</sup> Martin J. Cannon,<sup>5</sup> Kieng B. Vang,<sup>6</sup> and Ruud P.M. Dings<sup>1\*</sup>

Departments of <sup>1</sup>Radiation Oncology, <sup>2</sup>Biomedical Informatics, <sup>3</sup>Pathology,  
<sup>4</sup>Biostatistics, and <sup>5</sup>Immunology and Microbiology, University of Arkansas for  
Medical Sciences, Little Rock, AR USA

<sup>6</sup>Center for Integrative Nanotechnology Sciences, University of Arkansas at Little  
Rock, Little Rock, AR USA

\***Corresponding Author:** Ruud P.M. Dings, 4301 W. Markham Street, Mail Slot  
#771, Little Rock, AR 72205. Email: [rpmdings@uams.edu](mailto:rpmdings@uams.edu)

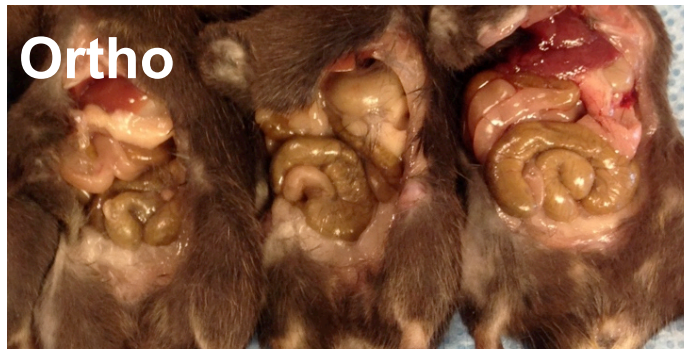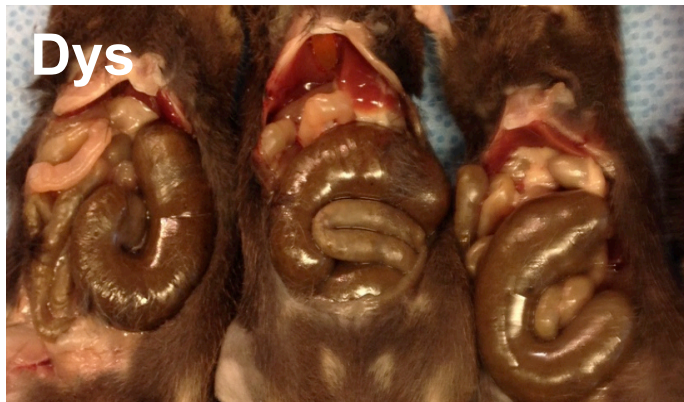

**Supplemental Figure 1. Ceca are enlarged by antibiotic-induced dysbiosis in mice.** Dysbiosis was induced by exposing mice to a cocktail of antibiotics in their drinking water 2 weeks before and during tumor development. Representative images of ceca in C57/BL6 mice bearing B16-F10 melanoma. Ortho = orthobiosis; Dys = dysbiosis

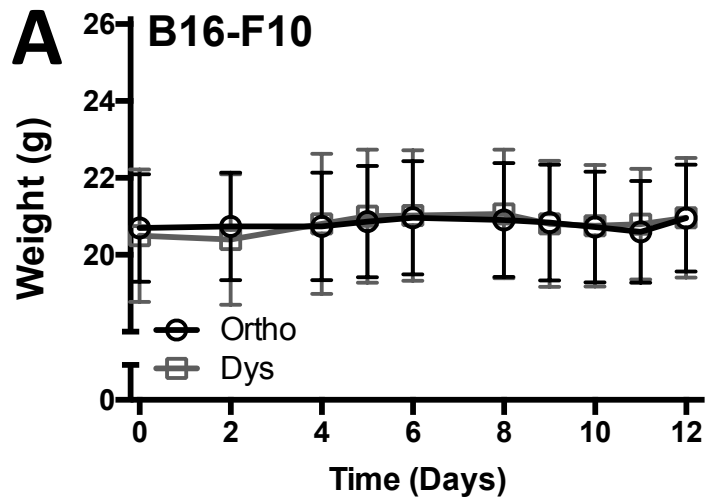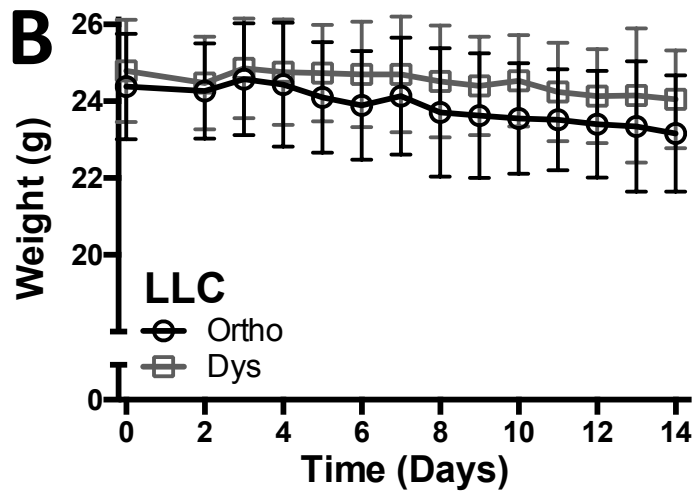

**Supplemental Figure 2. Antibiotic-induced dysbiosis does not affect body weights.** The body weights of (A) B16-F10 melanoma and (B) LLC-bearing mice. Data are shown as mean body weight in g  $\pm$  SD ( $n = 15-17$  animals per group pooled from 3 individual experiments.) -○- orthobiotic (Ortho) and -□- dysbiotic (Dys) mice.

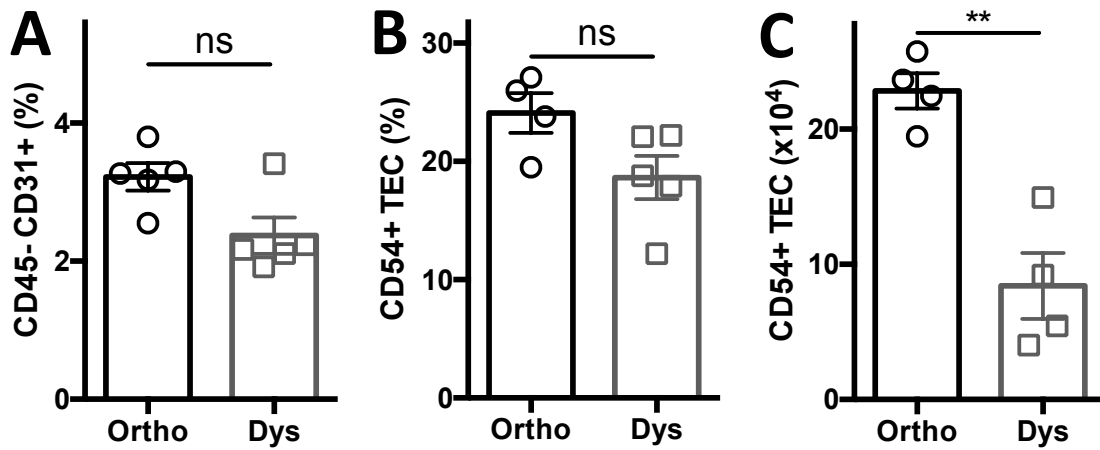

**Supplemental Figure 3. ICAM-1 expression is suppressed under dysbiotic conditions in the LLC model. (A)** Tumor endothelial cells (TEC; CD45- CD31+) are not reduced by antibiotic-induced dysbiosis. Quantification in **(B)** percentage and **(C)** absolute number of ICAM-1 (CD54+) TEC. Data are the mean ± SEM ( $n = 4-5$  LLC-bearing mice per group). \*\* $P < 0.01$ , two-sided t-test. ns = not significant. -○- orthobiotic (ortho) and -□- dysbiotic (dys) mice

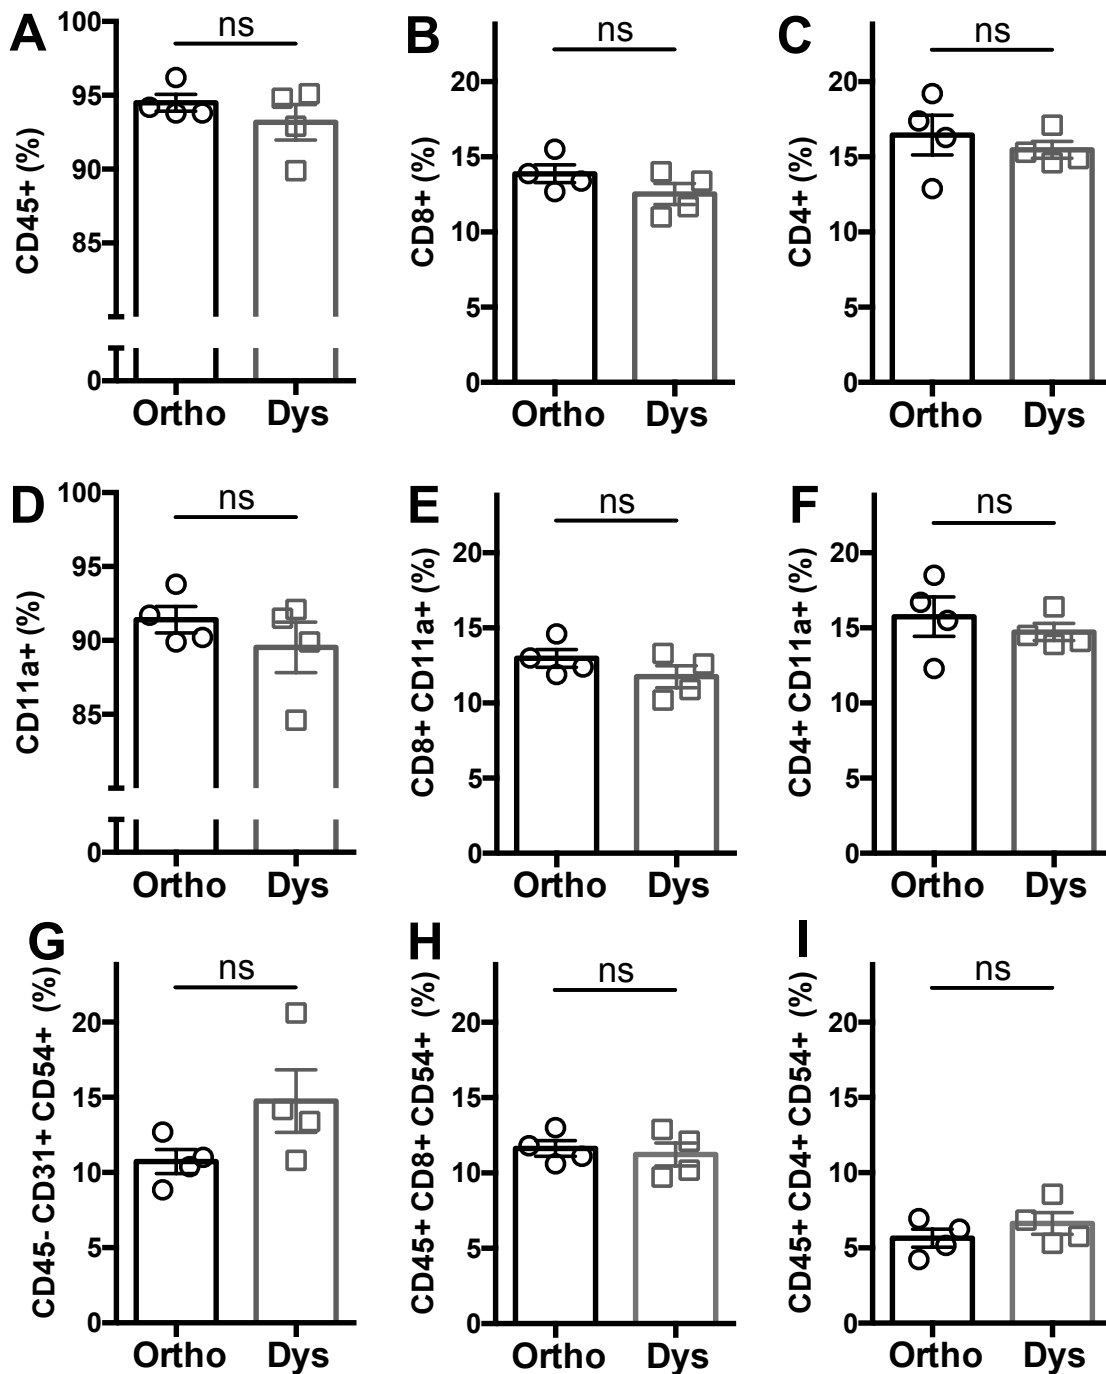

**Supplemental Figure 4. Dysbiosis does not affect cell populations and adhesion molecules in the spleen.** Dysbiosis does not change the amount of (A) CD45+ leukocytes, (B) CD8+ T cells or (C) CD4+ T cells in the spleen. ICAM-1 ligand, CD11a, expression is not affected by dysbiosis: (D) overall, (E) on CD8+ T cells, or (F) CD4+ T cells in the spleen. ICAM-1 (CD54) expression is not affected (G) on vasculature (CD45- CD31+), (H) CD8+ T cells (I) or CD4+ T cells in the spleen. Data are the mean  $\pm$  SEM ( $n = 4$ ). ns = not significant. -○- orthobiotic (ortho) and -□- dysbiotic (dys) mice.

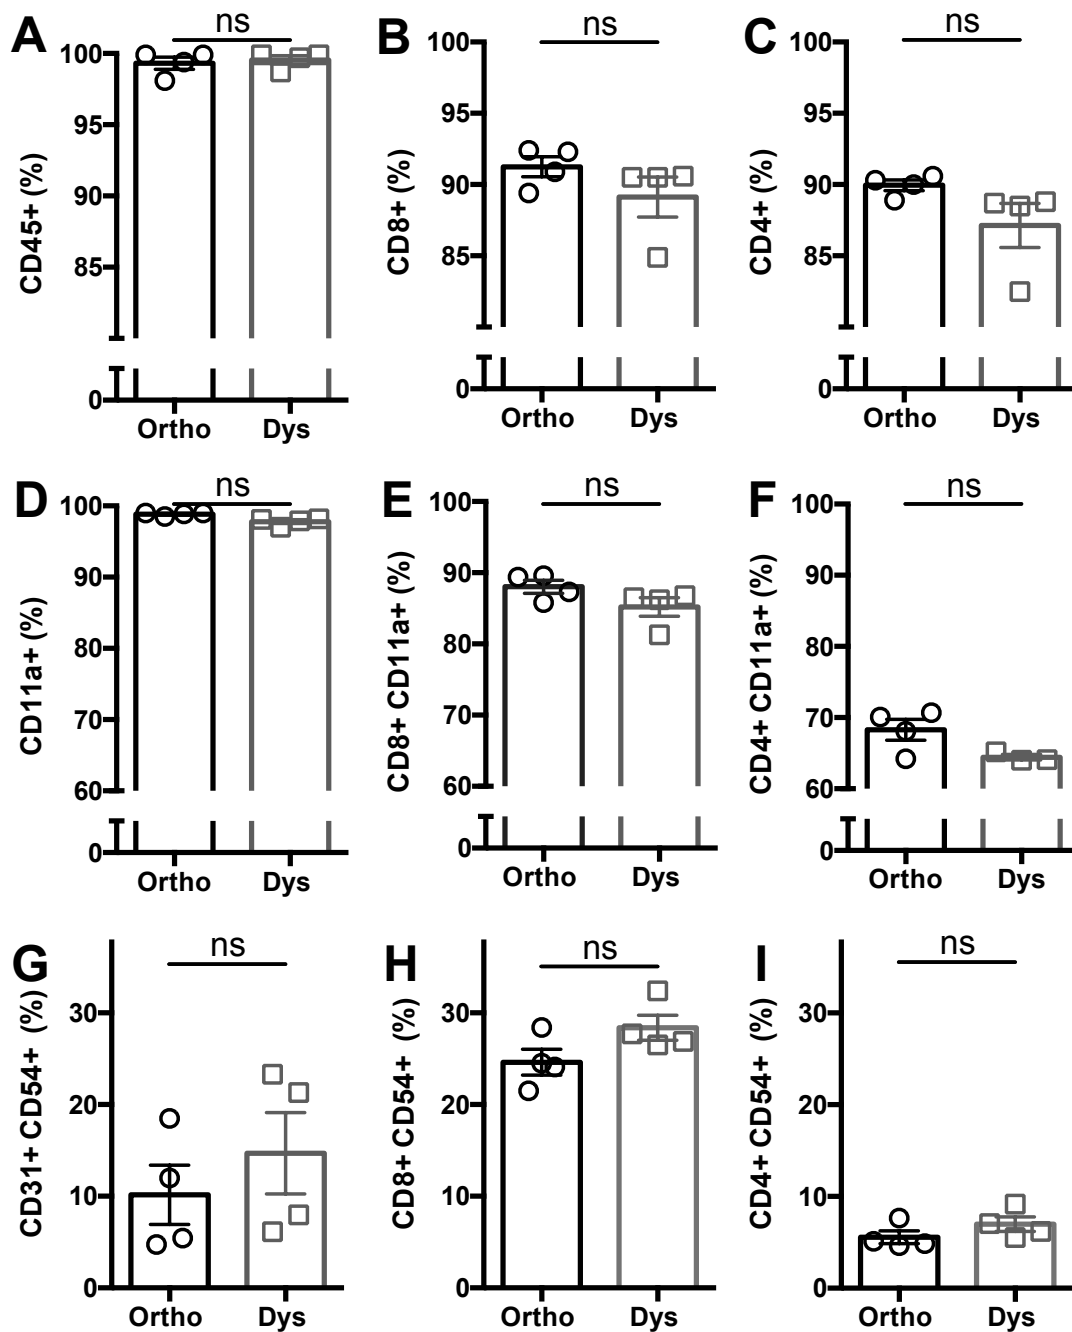

**Supplemental Figure 5. Dysbiosis does not affect cell populations and adhesion molecules in the thymus.** Dysbiosis does not change the amount of (A) CD45+ leukocytes, (B) CD8+ T cells or (C) CD4+ T cells in the thymus. ICAM-1 ligand, CD11a, expression is not affected by dysbiosis: (D) overall, (E) on CD8+ T cells, or (F) CD4+ T cells in the thymus. ICAM-1 (CD54) expression is not affected (G) on vasculature (CD45- CD31+), (H) CD8+ T cells (I) or CD4+ T cells in the spleen. Data are the mean  $\pm$  SEM ( $n = 4$ ). ns = not significant. -○- orthobiotic (Ortho) and -□- dysbiotic (Dys) mice.

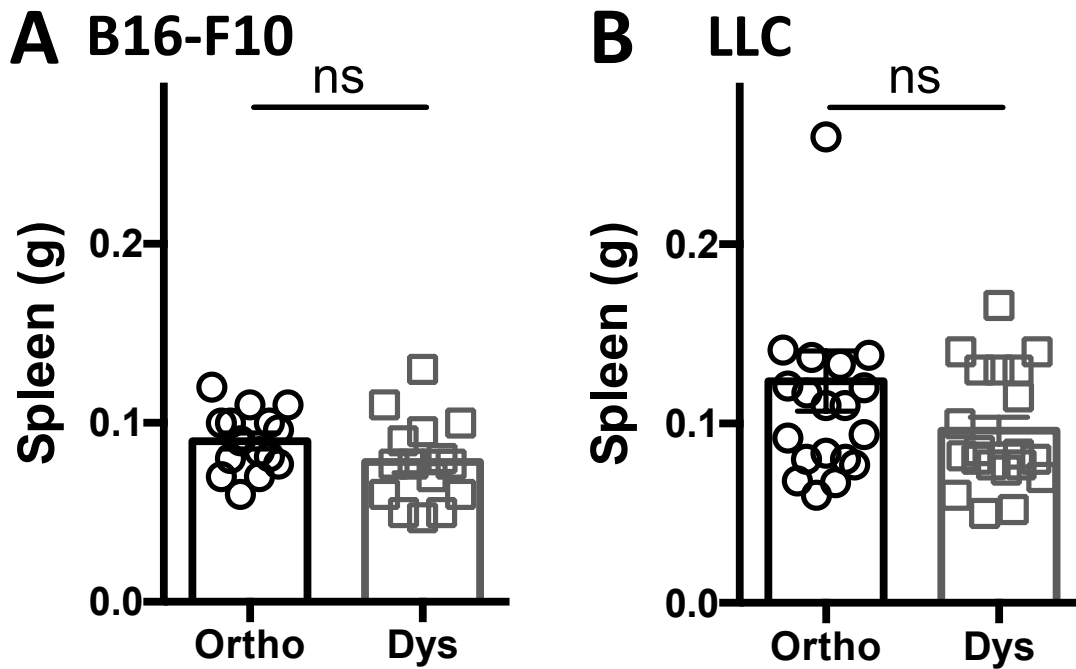

**Supplemental Figure 6. Antibiotic-induced dysbiosis does not affect spleens.** The weights of (A) spleens in B16-F10 melanoma and (B) LLC bearing mice. Data are shown as mean spleen weight in grams  $\pm$  SEM ( $n = 15-20$  animals per group pooled from 3 individual experiments.). ns = not significant. -  $\circ$ - orthobiotic (Ortho) and -  $\square$ - dysbiotic (Dys) mice.

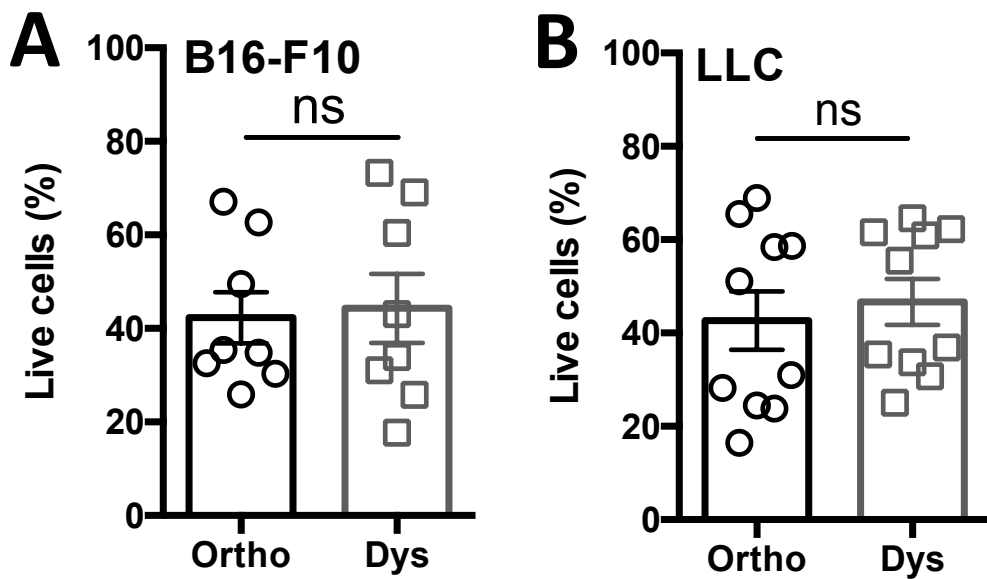

**Supplemental Figure 7. Dysbiosis does not change percentage of live cells in tumors.** Percentage of live cells quantified by fixable viability dye in tumors with or without antibiotic-induced dysbiosis in mice bearing (A) B16-F10 melanoma or (B) LLC. Data are the mean  $\pm$  SEM ( $n = 8-10$  tumors per group, pooled from 2 individual FACS experiments). ns = not significant. -○- orthobiotic (Ortho) and -□- dysbiotic (Dys) mice



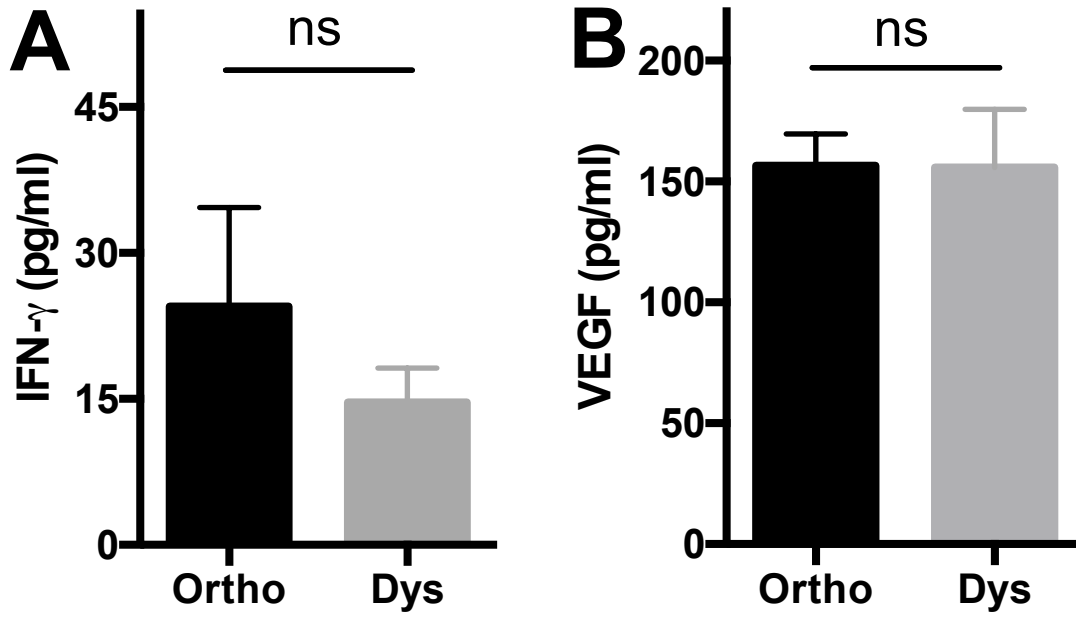

**Supplemental Figure 8. Antibiotic-induced dysbiosis does not suppress IFN- $\gamma$  or VEGF serum levels.** Serum levels of (A) IFN- $\gamma$  and (B) VEGF under orthobiotic (Ortho) and dysbiotic (Dys) conditions. ns = not significant.

**Supplemental Table 1**, Dysbiosis does not significantly affect adhesion molecules or cells populations in the spleen or thymus. Data are the mean (%)  $\pm$  SEM ( $n = 4$ ).

|                              | Spleen         |                | Thymus         |                |
|------------------------------|----------------|----------------|----------------|----------------|
|                              | Ortho          | Dys            | Ortho          | Dys            |
| <b>CD45- CD31+ CD54+ (%)</b> | 10.7 $\pm$ 1.6 | 14.7 $\pm$ 4.2 | 10.2 $\pm$ 6.5 | 14.7 $\pm$ 8.9 |
| <b>CD45+ (%)</b>             | 94.5 $\pm$ 1.1 | 93.2 $\pm$ 2.4 | 99.3 $\pm$ 0.9 | 99.6 $\pm$ 0.6 |
| <b>CD8+ (%)</b>              | 13.9 $\pm$ 1.2 | 12.5 $\pm$ 1.4 | 91.3 $\pm$ 1.4 | 89.1 $\pm$ 2.8 |
| <b>CD4+ (%)</b>              | 16.5 $\pm$ 2.7 | 15.5 $\pm$ 1.1 | 90.0 $\pm$ 0.7 | 87.1 $\pm$ 3.1 |
| <b>CD8+ CD54+ (%)</b>        | 11.6 $\pm$ 1.0 | 11.2 $\pm$ 0.8 | 24.6 $\pm$ 2.8 | 28.4 $\pm$ 2.7 |
| <b>CD4+ CD54+ (%)</b>        | 5.7 $\pm$ 1.2  | 6.6 $\pm$ 1.4  | 5.6 $\pm$ 1.4  | 7.0 $\pm$ 1.6  |
| <b>CD8+ CD11a+ (%)</b>       | 13.0 $\pm$ 1.2 | 12.5 $\pm$ 1.4 | 88.0 $\pm$ 1.8 | 85.2 $\pm$ 2.6 |
| <b>CD4+ CD11a+ (%)</b>       | 15.8 $\pm$ 2.6 | 14.7 $\pm$ 1.1 | 68.3 $\pm$ 2.9 | 64.4 $\pm$ 0.7 |
